# Supplementary material
Source: MDPI journal article supplement (https://www.mdpi.com/2073-4441/14/20/3210)
Supplement: s1 [file s1 › water-1904096-supplementary.pdf]

# Assessment of Artificial Sweeteners as Wastewater Co-Tracers in an Urban Groundwater System of Mexico (Monterrey Metropolitan Area)

Edrick Ramos <sup>1</sup>, Diego Padilla-Reyes <sup>1</sup>, Abrahan Mora <sup>2</sup>, Hector Barrios-Piña <sup>3</sup>, Shashi Kant <sup>3</sup>  
and Jürgen Mahlknecht <sup>1,\*</sup>

<sup>1</sup> Escuela de Ingeniería y Ciencias, Tecnológico de Monterrey, Av. Eugenio Garza Sada Sur N° 2501, Monterrey 64849, Nuevo León, Mexico

<sup>2</sup> Escuela de Ingeniería y Ciencias, Tecnológico de Monterrey, Atlixcáyotl 5718, Reserva Territorial Atlixcáyotl, Puebla 72453, Puebla, Mexico

<sup>3</sup> Escuela de Ingeniería y Ciencias, Tecnológico de Monterrey, Av. General Ramón Corona #2514, Col. Nuevo México, Zapopan 45138, Jalisco, Mexico

\* Correspondence: jurgen@tec.mx; Tel.: +52-81-1577-9870

**Citation:** Ramos, E.; Padilla-Reyes, D.; Mora, A.; Barrios-Piña, H.; Kant, S.; Mahlknecht, J. Assessment of Artificial Sweeteners as Wastewater Tracers in an Urban Groundwater System of Mexico (Monterrey Metropolitan Area). *Water* **2022**, *14*, 3210. <https://doi.org/10.3390/w14203210>

Academic Editors: Alberto Tazioli and Davide Fronzi

Received: 23 August 2022

Accepted: 29 September 2022

Published: 12 October 2022

**Publisher's Note:** MDPI stays neutral with regard to jurisdictional claims in published maps and institutional affiliations.

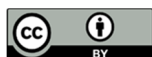

**Copyright:** © 2022 by the authors. Licensee MDPI, Basel, Switzerland. This article is an open access article distributed under the terms and conditions of the Creative Commons Attribution (CC BY) license (<https://creativecommons.org/licenses/by/4.0/>).

## 1. Supplementary Materials

### 1.1 Background on Asws Local Regulation

In Mexico, the use of Asws have been regulated for food services and non-alcoholic beverages under the NOM-086-SSA1-1994. Such regulation establishes the use of acesulfame (ACE), aspartame (ASP), cyclamate (CYC), saccharin (SAC), and sucralose (SUC) as synthetic compounds that can substitute (in full or half) the sweetness of natural sugars (e.g., sucrose) [38]. The main chemical descriptions, sweetness equivalent (to sucrose), and global market for five common Asws are shown on **Table 1**. Despite such consumption regulation, local normative pertaining drinking water quality (NOM-127-SSA1-1994) and wastewater treatment plant (WWTP) effluent discharges into national waters (NOM-001-ECOL-1996) policies does not consider nor regulate the presence of Asws as potential pollutants into aqueous environments. Unlike other contaminants of environmental concern such as agrochemical or industrial residues in urban water systems, the fate and occurrence of Asws has been linked to anthropogenic pollution and limited information is available regarding the understanding of possible environmental threats for Mexican water resources. It is of particular concern since at least 96% of the Mexican population consume at least one product made with artificial sweeteners daily [49], resulting in a significant environmental entryway of such sweetening compounds through urban sewage into surface and groundwater resources. The impact of artificial sweeteners in urban groundwater systems is understudied in the Mexican territory.

**Table S1.** Artificial sweeteners main chemical characteristics, uses, and market locations.

| Compound Name      | Structure                                                                                             | MW (g/mol) | log K <sub>ow</sub> | Solubility (mg/L) | Sugar equivalence | Tabletop brand                                                     | Uses                                                                                                                                            | Market                          |
|--------------------|-------------------------------------------------------------------------------------------------------|------------|---------------------|-------------------|-------------------|--------------------------------------------------------------------|-------------------------------------------------------------------------------------------------------------------------------------------------|---------------------------------|
| Acesulfame k (ACE) | 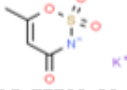<br>CAS: 55589-62-3  | 163.2      | -1.33               | 587,500           | 100 - 200         | Nutra Sweet, Equal, DiabeSugar, Sweeny, Sweet-O, Azucar BC, Stevia | Candies, tabletop sweetener, chewing gum, jam, gellatins, baked goods, and dairy products                                                       | Asia<br>Europe<br>North America |
| Cyclamate (CYC)    | 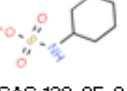<br>CAS: 139-05-9    | 201.22     | -2.63               | 1,000,000         | 30 - 50           | No brand names                                                     | Cereal bars, bakery products, vitamins, and dietary supplements, tabletop sweeteners, dairy products                                            | Asia<br>Europe                  |
| Saccharin (SAC)    | 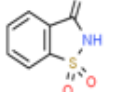<br>CAS: 81-06-2     | 183.18     | 0.91                | 4,000             | 200 - 700         | Necta Sweet, Sweet'N Low                                           | Fruit based snacks, soft drinks, dried fruit snacks, baked products, jams & jellies, vitamins & dietary supplements, toothpaste                 | Asia<br>Europe<br>North America |
| Sucralose (SUC)    | 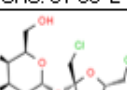<br>CAS: 56038-13-2  | 397.64     | -1                  | 109,800           | 600               | Splenda                                                            | Chewing gum, soft drinks, energy drinks, pastas, cakes, candies, cereal, ice cream & dairy, yogurts, mermelades, vitamins & dietary supplements | North America                   |
| Aspartame (ASP)    | 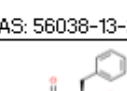<br>CAS: 22839-47-0 | 201.22     | -2.63               | 1,000,000         | 180 - 200         | Equal, Nutra Sweet                                                 | Yogurts, Soft drinks, Pharmaceuticals, Gellatins                                                                                                | Asia<br>Europe<br>North America |

### 1.2 Historical climate in the Monterrey Metropolitan Area

Weather data from the MMA region was retrieved from Mexico's National Meteorological Service for Monterrey gauge station #19082 which is currently operating and located in the San Nicolás de los Garza municipality for the period of 1951–2021. Mean annual precipitation reaches 622 mm and 22.7 °C, respectively. Mean monthly precipitation spatiotemporal variation range between 14.1 and 150.6 mm and mean monthly temperature ranging 14.5 to 28.4 °C [29].

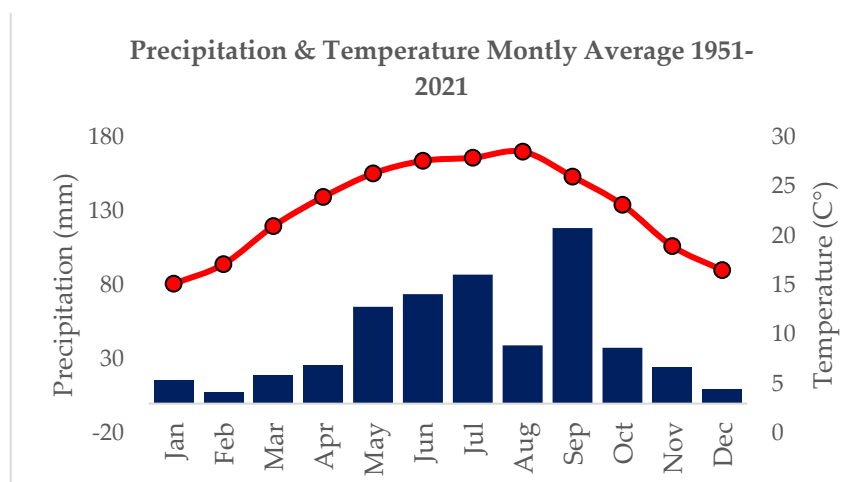

**Figure S1.** Historical (1951–2021) monthly precipitation and mean monthly temperature on the Monterrey Metropolitan Area (source: <http://clicom-mex.cicese.mx.>).

## 1.3 Normality tests

**Table S2.** Summary of Shapiro Wilk test for normality for chemical parameters measured from MMA sampled wells.

|                                        | Tests of Normality              |    |       |              |    |       |
|----------------------------------------|---------------------------------|----|-------|--------------|----|-------|
|                                        | Kolmogorov-Smirnov <sup>a</sup> |    |       | Shapiro-Wilk |    |       |
|                                        | Statistic                       | df | Sig.  | Statistic    | df | Sig.  |
| Temperature (°C)                       | 0.148                           | 42 | 0.022 | 0.953        | 42 | 0.084 |
| pH                                     | 0.209                           | 42 | 0.000 | 0.844        | 42 | 0.000 |
| Electrical Conductivity (µs/cm)        | 0.187                           | 42 | 0.001 | 0.865        | 42 | 0.000 |
| Eh (mV)                                | 0.154                           | 42 | 0.014 | 0.911        | 42 | 0.003 |
| Dissolved Oxygen (mg/L)                | 0.423                           | 42 | 0.000 | 0.250        | 42 | 0.000 |
| TDS (mg/L)                             | 0.181                           | 42 | 0.001 | 0.848        | 42 | 0.000 |
| CO <sub>3</sub> <sup>-</sup> (mg/L)    | 0.161                           | 42 | 0.008 | 0.811        | 42 | 0.000 |
| HCO <sub>3</sub> <sup>-</sup> (mg/L)   | 0.167                           | 42 | 0.005 | 0.774        | 42 | 0.000 |
| F <sup>-</sup> (mg/L)                  | 0.213                           | 42 | 0.000 | 0.894        | 42 | 0.001 |
| Cl <sup>-</sup> (mg/L)                 | 0.214                           | 42 | 0.000 | 0.794        | 42 | 0.000 |
| NO <sub>3</sub> -N (mg/L)              | 0.208                           | 42 | 0.000 | 0.802        | 42 | 0.000 |
| SO <sub>4</sub> <sup>-</sup> (mg/L)    | 0.261                           | 42 | 0.000 | 0.800        | 42 | 0.000 |
| PO <sub>4</sub> -P <sup>-</sup> (mg/L) | 0.342                           | 42 | 0.000 | 0.737        | 42 | 0.000 |
| Ca <sup>2+</sup> (mg/L)                | 0.179                           | 42 | 0.002 | 0.858        | 42 | 0.000 |
| K <sup>+</sup> (mg/L)                  | 0.228                           | 42 | 0.000 | 0.845        | 42 | 0.000 |
| Mg <sup>2+</sup> (mg/L)                | 0.159                           | 42 | 0.009 | 0.750        | 42 | 0.000 |
| Na <sup>+</sup> (mg/L)                 | 0.224                           | 42 | 0.000 | 0.708        | 42 | 0.000 |
| Si (mg/L)                              | 0.138                           | 42 | 0.042 | 0.946        | 42 | 0.045 |
| B (µg/L)                               | 0.211                           | 42 | 0.000 | 0.761        | 42 | 0.000 |
| Br (µg/L)                              | 0.233                           | 42 | 0.000 | 0.646        | 42 | 0.000 |
| I (µg/L)                               | 0.300                           | 42 | 0.000 | 0.455        | 42 | 0.000 |
| Acesulfame (µg/L)                      | 0.248                           | 42 | 0.000 | 0.844        | 42 | 0.000 |
| Sucralose (µg/L)                       | 0.256                           | 42 | 0.000 | 0.700        | 42 | 0.000 |

a. Lilliefors significance correction

#### 1.4 Kruskal Wallis test for Asws seasonal variability

**Table S3.** Summary of Kruskal Wallis non-parametric test for determining Asws seasonal variability.

| Summary of contrast hypothesis |                                                                    |                                              |       |
|--------------------------------|--------------------------------------------------------------------|----------------------------------------------|-------|
|                                | Null Hypothesis                                                    | Test                                         | Sig.  |
| 1                              | Acesulfame distribution is the same between the Season categories. | Kruskal-Wallis test for independent samples. | 0.009 |
| 2                              | Sucralose distribution is the same between the Season categories.  | Kruskal-Wallis test for independent samples. | 0.009 |

Asymptotic differences are shown. The significance level is 0.05.

## 1.5 Spearman correlation

Table S4. Spearman rank-order correlation matrix.

| Parameters | SUC     | ACE     | I       | Br      | B       | Na+     | Mg2+    | K+      | Ca2+    | PO4-   | SO4-    | NO3-    | NO2-    | Cl-     | F-      | HCO3-   | TDS     | DO      | Eh      | EC      | pH      | Temp  |
|------------|---------|---------|---------|---------|---------|---------|---------|---------|---------|--------|---------|---------|---------|---------|---------|---------|---------|---------|---------|---------|---------|-------|
| Temp       | .332*   | 0.225   | .458**  | .421**  | .471**  | .400**  | .310*   | .363*   | 0.128   | 0.070  | 0.155   | .511**  | .355*   | .497**  | .462**  | 0.055   | .378*   | -.445** | -.550** | .456**  | -.0.141 | 1.000 |
| pH         | -.531** | -.732** | -.538** | -.594** | -.493** | -.595** | -0.277  | -.468** | -.505** | 0.071  | -.650** | -.633** | -.532** | -.592** | 0.036   | -.533** | -.602** | 0.211   | .516**  | -.603** | 1.000   |       |
| EC         | .700**  | .768**  | .849**  | .890**  | .832**  | .894**  | .613**  | .672**  | .576**  | -0.130 | .827**  | .880**  | .888**  | .912**  | .321*   | .727**  | .990**  | -.371*  | -.582** | 1.000   |         |       |
| Eh         | -.378*  | -.488** | -.671** | -.593** | -.666** | -.575** | -.533** | -.421** | -0.268  | 0.221  | -.371*  | -.705** | -.505** | -.642** | -.468** | -.347*  | -.528** | .377*   | 1.000   |         |         |       |
| DO         | -0.093  | -0.121  | -0.205  | -0.222  | -0.213  | -0.230  | -0.113  | -0.103  | -0.171  | 0.103  | -0.288  | -0.296  | -.444** | -.306*  | -.531** | -0.070  | -.365*  | 1.000   |         |         |         |       |
| TDS        | .679**  | .755**  | .813**  | .868**  | .791**  | .879**  | .594**  | .656**  | .596**  | -0.118 | .850**  | .844**  | .900**  | .879**  | 0.295   | .733**  | 1.000   |         |         |         |         |       |
| HCO3-      | .675**  | .710**  | .685**  | .737**  | .697**  | .737**  | .517**  | .671**  | .581**  | -0.028 | .649**  | .620**  | .618**  | .697**  | -0.131  | 1.000   |         |         |         |         |         |       |
| F-         | -0.018  | 0.130   | .394**  | .328*   | .398**  | .324*   | .484**  | 0.213   | -0.013  | -.310* | 0.144   | .360*   | .354*   | .352*   | 1.000   |         |         |         |         |         |         |       |
| Cl-        | .786**  | .844**  | .927**  | .956**  | .934**  | .957**  | .737**  | .774**  | .572**  | -0.185 | .745**  | .935**  | .833**  | 1.000   |         |         |         |         |         |         |         |       |
| NO2-       | .579**  | .661**  | .700**  | .790**  | .719**  | .839**  | .496**  | .562**  | .628**  | -0.120 | .855**  | .752**  | 1.000   |         |         |         |         |         |         |         |         |       |
| NO3-       | .713**  | .812**  | .892**  | .890**  | .875**  | .867**  | .737**  | .699**  | .490**  | -0.132 | .707**  | 1.000   |         |         |         |         |         |         |         |         |         |       |
| SO4-       | .529**  | .727**  | .636**  | .730**  | .621**  | .777**  | .426**  | .510**  | .692**  | -0.126 | 1.000   |         |         |         |         |         |         |         |         |         |         |       |
| PO4-       | 0.036   | -0.138  | -0.266  | -0.213  | -0.157  | -0.179  | -0.215  | 0.083   | -0.069  | 1.000  |         |         |         |         |         |         |         |         |         |         |         |       |
| Ca2+       | .377*   | .575**  | .510**  | .666**  | .551**  | .699**  | .404**  | .506**  | 1.000   |        |         |         |         |         |         |         |         |         |         |         |         |       |
| K+         | .757**  | .738**  | .796**  | .834**  | .867**  | .834**  | .769**  | 1.000   |         |        |         |         |         |         |         |         |         |         |         |         |         |       |
| Mg2+       | .552**  | .601**  | .873**  | .803**  | .845**  | .763**  | 1.000   |         |         |        |         |         |         |         |         |         |         |         |         |         |         |       |
| Na+        | .771**  | .852**  | .927**  | .983**  | .944**  | 1.000   |         |         |         |        |         |         |         |         |         |         |         |         |         |         |         |       |
| B          | .751**  | .792**  | .950**  | .955**  | 1.000   |         |         |         |         |        |         |         |         |         |         |         |         |         |         |         |         |       |
| Br         | .763**  | .854**  | .951**  | 1.000   |         |         |         |         |         |        |         |         |         |         |         |         |         |         |         |         |         |       |
| I          | .764**  | .783**  | 1.000   |         |         |         |         |         |         |        |         |         |         |         |         |         |         |         |         |         |         |       |
| ACE        | .732**  | 1.000   |         |         |         |         |         |         |         |        |         |         |         |         |         |         |         |         |         |         |         |       |
| SUC        | 1.000   |         |         |         |         |         |         |         |         |        |         |         |         |         |         |         |         |         |         |         |         |       |

\*Correlation is significant at the 0.05 level (two-tailed). \*\*correlation is significant at the 0.001 level (two-tailed)
